# Supplementary material
Source: PubMed Central journal article supplement (PMC5871337)
Supplement: cm7b04382_si_001.pdf [file cm7b04382_si_001.pdf]

## *Supporting Information for*

### **Popcorn-shaped Fe<sub>x</sub>O (Wüstite) Nanoparticles from a Single-Source Precursor: Colloidal Synthesis and Magnetic Properties**

*Christoph P. Guntlin,<sup>†, §</sup> Stefan T. Ochsenbein,<sup>†, §</sup> Michael Wörle,<sup>†</sup> Rolf Erni,<sup>‡</sup> Kostiantyn V. Kravchyk,<sup>†, §</sup> and Maksym V. Kovalenko,<sup>\*, †, §</sup>*

<sup>†</sup>Department of Chemistry and Applied Biosciences, ETH Zürich - Laboratory for Inorganic Chemistry, Vladimir Prelog Weg 1, CH-8093 Zürich, Switzerland

<sup>§</sup>Laboratory for Thin Films and Photovoltaics and <sup>‡</sup>Electron Microscopy Center, Empa - Swiss Federal Laboratories for Materials Science and Technology, Überlandstrasse 129, CH-8600 Dübendorf, Switzerland

\*E-mail: mvkovalenko@ethz.ch

## Structure determination

### Crystallographic information for $[\text{Fe}_3(\mu_3\text{-O})(\text{CF}_3\text{COO})(\mu\text{-CF}_3\text{COO})_6(\text{H}_2\text{O})_2]\cdot\text{CF}_3\text{COOH}$ (“ $\text{Fe}_3\text{OTFA}$ ”)

Single crystals of “ $\text{Fe}_3\text{OTFA}$ ” were grown from crude synthesis solution by keeping it at room temperature (RT) under  $\text{N}_2$  flow for several days.

The crystals disintegrate when cooled to 100 K. Therefore, the single crystal XRD measurement was done at 250 K. All  $\text{CF}_3$ -groups are strongly disordered and a free refinement without restraints/constraints was not possible due to high correlation matrix elements. The final description of each of the  $\text{CF}_3$ -groups has been done with disorder over two sites, anisotropic displacement parameters and distance restraints, forcing the C-F, F-F and some C-C-distances equal.

An alternative description of the disorder over three or four sites with isotropic displacement parameters led to higher R-values and significant residual electron density close to the disordered fluorine sites. The hydrogen atoms were found in the difference map, however, a free refinement was only possible with the hydrogen atom H2 at the TFA, and the water molecules were refined as rigid groups.

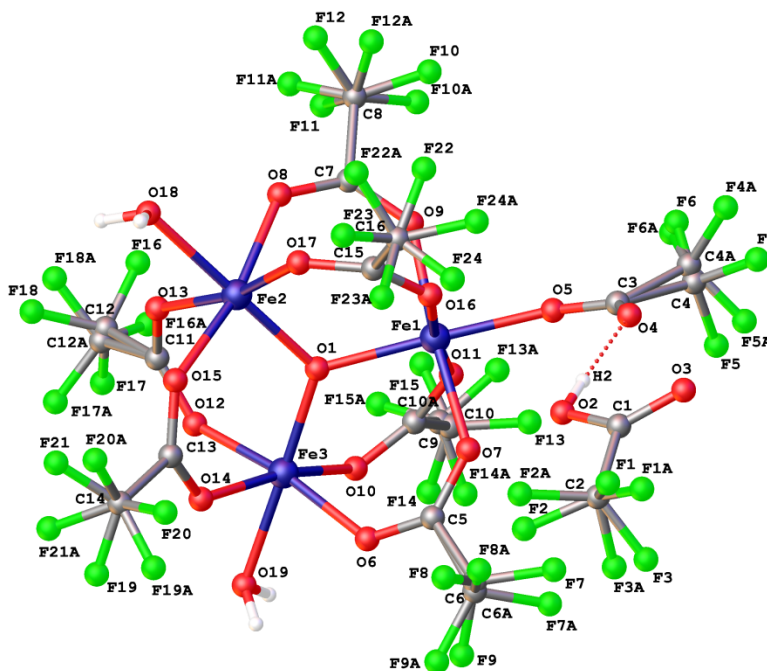

**Figure S1.** Crystal structure of “ $\text{Fe}_3\text{OTFA}$ ”. Because of large displacement parameters of fluorine, the structure is drawn with isotropic displacement parameters for clarity.

**Table S1.** Crystal data and structure refinement for “Fe<sub>3</sub>OTFA”.

|                                             |                                                                              |
|---------------------------------------------|------------------------------------------------------------------------------|
| CCDC number                                 | <b>1559925</b>                                                               |
| Empirical formula                           | <b>C<sub>16</sub>H<sub>5</sub>F<sub>24</sub>Fe<sub>3</sub>O<sub>19</sub></b> |
| Formula weight / g mol <sup>-1</sup>        | <b>1124.75</b>                                                               |
| Temperature / K                             | <b>250</b>                                                                   |
| Crystal system                              | <b>monoclinic</b>                                                            |
| Space group                                 | <b><i>P2<sub>1</sub>/n</i></b>                                               |
| a / Å                                       | <b>12.2131(19)</b>                                                           |
| b / Å                                       | <b>15.207(2)</b>                                                             |
| c / Å                                       | <b>20.901(4)</b>                                                             |
| α / °                                       | <b>90</b>                                                                    |
| β / °                                       | <b>106.855(2)</b>                                                            |
| γ / °                                       | <b>90</b>                                                                    |
| Volume / Å <sup>3</sup>                     | <b>3715.1(11)</b>                                                            |
| Z                                           | <b>4</b>                                                                     |
| ρ <sub>calc</sub> / g cm <sup>-3</sup>      | <b>2.011</b>                                                                 |
| μ / mm <sup>-1</sup>                        | <b>1.347</b>                                                                 |
| F(000)                                      | <b>2188.0</b>                                                                |
| Crystal size / mm <sup>3</sup>              | <b>0.418 × 0.312 × 0.239</b>                                                 |
| Radiation                                   | <b>Mo Kα (λ = 0.71073)</b>                                                   |
| 2θ range for data collection / °            | <b>3.364 to 51.966</b>                                                       |
| Index ranges                                | <b>-14 ≤ h ≤ 14, -18 ≤ k ≤ 18, -25 ≤ l ≤ 25</b>                              |
| Reflections collected                       | <b>25309</b>                                                                 |
| Independent reflections                     | <b>7200 [R<sub>int</sub> = 0.0360]</b>                                       |
| Data/restraints/parameters                  | <b>7200/846/801</b>                                                          |
| Goodness-of-fit on F <sup>2</sup>           | <b>1.043</b>                                                                 |
| Final R indexes [I ≥ 2σ (I)]                | <b>R<sub>1</sub> = 0.0424, wR<sub>2</sub> = 0.1014</b>                       |
| Final R indexes [all data]                  | <b>R<sub>1</sub> = 0.0631, wR<sub>2</sub> = 0.1149</b>                       |
| Largest diff. peak/hole / e Å <sup>-3</sup> | <b>0.37/-0.36</b>                                                            |

**Table S2.** Bond lengths for “Fe<sub>3</sub>OTFA”.

| <b>Atom</b> | <b>Atom</b> | <b>Length/Å</b> | <b>Atom</b> | <b>Atom</b> | <b>Length/Å</b> |
|-------------|-------------|-----------------|-------------|-------------|-----------------|
| Fe1         | O1          | 1.959(2)        | C14         | F19         | 1.258(7)        |
| Fe1         | O5          | 1.944(2)        | C14         | F20         | 1.259(7)        |
| Fe1         | O7          | 2.018(2)        | C14         | F21         | 1.259(7)        |
| Fe1         | O9          | 2.009(3)        | C15         | C16         | 1.532(5)        |
| Fe1         | O11         | 2.002(2)        | C16         | F22         | 1.202(10)       |
| Fe1         | O16         | 2.014(2)        | C16         | F23         | 1.202(10)       |
| Fe2         | O1          | 1.885(2)        | C16         | F24         | 1.202(11)       |
| Fe2         | O8          | 1.989(3)        | F4          | C4          | 1.288(3)        |
| Fe2         | O13         | 2.017(2)        | F5          | C4          | 1.287(3)        |
| Fe2         | O15         | 2.003(3)        | F6          | C4          | 1.287(3)        |
| Fe2         | O17         | 2.000(2)        | F7          | C6          | 1.287(2)        |
| Fe2         | O18         | 2.064(2)        | F8          | C6          | 1.287(2)        |
| Fe3         | O1          | 1.904(2)        | F9          | C6          | 1.287(2)        |
| Fe3         | O6          | 1.990(2)        | F13         | C10         | 1.272(3)        |
| Fe3         | O10         | 2.002(2)        | F14         | C10         | 1.272(3)        |
| Fe3         | O12         | 2.010(2)        | F15         | C10         | 1.271(3)        |
| Fe3         | O14         | 2.004(3)        | F16         | C12         | 1.268(3)        |
| Fe3         | O19         | 2.048(2)        | F17         | C12         | 1.268(3)        |
| O4          | C3          | 1.224(4)        | F18         | C12         | 1.268(3)        |
| O5          | C3          | 1.238(4)        | F4A         | C4A         | 1.287(3)        |
| O6          | C5          | 1.226(4)        | F5A         | C4A         | 1.287(3)        |
| O7          | C5          | 1.232(4)        | F6A         | C4A         | 1.287(3)        |
| O8          | C7          | 1.234(5)        | F7A         | C6A         | 1.287(3)        |
| O9          | C7          | 1.224(4)        | F8A         | C6A         | 1.287(3)        |
| O10         | C9          | 1.233(4)        | F9A         | C6A         | 1.287(3)        |
| O11         | C9          | 1.214(4)        | F13A        | C10A        | 1.272(3)        |
| O12         | C11         | 1.227(4)        | F14A        | C10A        | 1.272(3)        |
| O13         | C11         | 1.227(4)        | F15A        | C10A        | 1.271(3)        |
| O14         | C13         | 1.227(5)        | F16A        | C12A        | 1.268(3)        |
| O15         | C13         | 1.223(5)        | F17A        | C12A        | 1.268(3)        |
| O16         | C15         | 1.226(4)        | F18A        | C12A        | 1.268(3)        |
| O17         | C15         | 1.231(4)        | O2          | C1          | 1.273(4)        |
| C3          | C4          | 1.530(9)        | O3          | C1          | 1.194(4)        |
| C5          | C6          | 1.508(10)       | C1          | C2          | 1.513(6)        |
| C7          | C8          | 1.537(6)        | C2          | F1          | 1.288(3)        |
| C8          | F10         | 1.276(5)        | C2          | F2          | 1.288(3)        |
| C8          | F11         | 1.277(5)        | C2          | F3          | 1.288(3)        |
| C8          | F12         | 1.277(5)        | C2          | F1A         | 1.288(3)        |
| C9          | C10         | 1.544(12)       | C2          | F2A         | 1.288(3)        |
| C11         | C12         | 1.532(12)       | C2          | F3A         | 1.288(3)        |
| C13         | C14         | 1.537(6)        |             |             |                 |

## Crystallographic information for $[\text{Fe}_3(\mu_3\text{-O})(\mu\text{-CF}_3\text{COO})_6(\text{H}_2\text{O})_3][\text{FeCl}_4]$

The same synthesis conditions as for “ $\text{Fe}_3\text{OTFA}$ ”, but reducing the synthesis temperature to 60 °C after water addition, yields a different molecule, which crystallizes by slow cooling after re-dissolving it in TFA at 50 °C as  $[\text{Fe}_3(\mu_3\text{-O})(\mu\text{-CF}_3\text{COO})_6(\text{H}_2\text{O})_3][\text{FeCl}_4]$  (Figure S2, Table S3-4). This molecule has the same core structure as “ $\text{Fe}_3\text{OTFA}$ ” with three Fe(III) atoms in an octahedral environment sharing one oxygen atom, but with a water molecule on each Fe(III) atom trans to the Fe- $\mu_3\text{O}$  bond. The triangular core is thus positively charged, the  $[\text{FeCl}_4]^-$  complex providing charge balance. Due to the lower reaction temperature of 60 °C a certain amount of the reactant ( $\text{FeCl}_3$ ) remain in the system as well as some chlorine anions (coming from reacted  $\text{FeCl}_3$ ). At this low temperature, the built  $[\text{FeCl}_4]^-$  complex is meta stable coordinated to the positive charged  $[\text{Fe}_3(\mu_3\text{-O})(\mu\text{-CF}_3\text{COO})_6(\text{H}_2\text{O})_3]^+$ .

Most of the  $\text{CF}_3$ -groups show a considerable amount of disorder, leading to the pronounced anisotropy of the corresponding displacement parameters. The hydrogen atom positions were found in the difference Fourier map, however a free refinement of the positional and displacement parameters (with exception of a restraint forcing both O-H-distances equal) was only possible for the hydrogen atoms attached to O4, one of which forms a hydrogen bond to Cl11 of the  $[\text{FeCl}_4]^-$  ion.

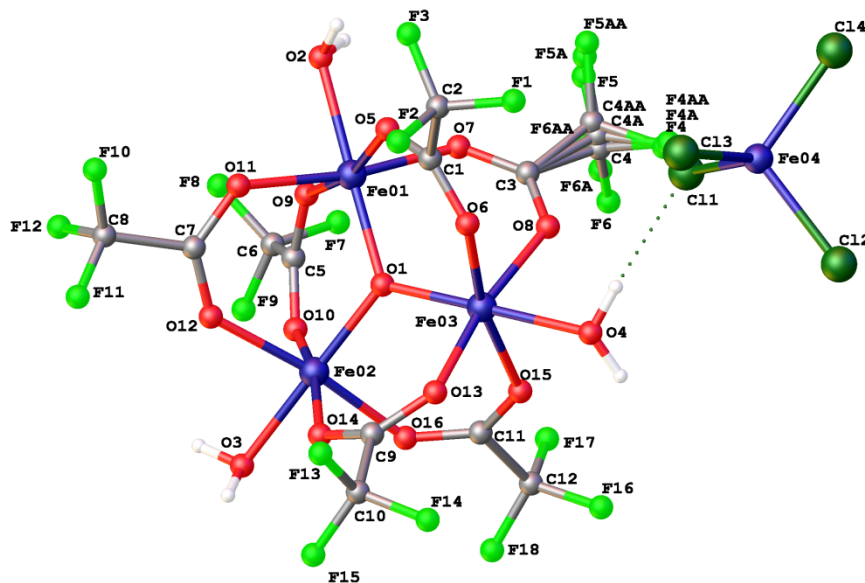

**Figure S2.** Asymmetric unit of  $[\text{Fe}_3(\mu_3\text{-O})(\mu\text{-CF}_3\text{COO})_6(\text{H}_2\text{O})_3][\text{FeCl}_4]$ . Because of large displacement parameters of fluorine, the structure is drawn with isotropic displacement parameters for clarity.

**Table S3.** Crystal data and structure refinement for  $[\text{Fe}_3(\mu_3\text{-O})(\mu\text{-CF}_3\text{COO})_6(\text{H}_2\text{O})_3][\text{FeCl}_4]$ .

|                                                |                                                                                             |
|------------------------------------------------|---------------------------------------------------------------------------------------------|
| CCDC number                                    | <b>1559926</b>                                                                              |
| Empirical formula                              | <b><math>\text{C}_{12}\text{H}_6\text{Cl}_4\text{F}_{18}\text{Fe}_4\text{O}_{16}</math></b> |
| Formula weight / $\text{g mol}^{-1}$           | <b>1113.42</b>                                                                              |
| Temperature / K                                | <b>100.0</b>                                                                                |
| Crystal system                                 | <b>monoclinic</b>                                                                           |
| Space group                                    | <b><i>P21/c</i></b>                                                                         |
| $a / \text{\AA}$                               | <b>13.5360(7)</b>                                                                           |
| $b / \text{\AA}$                               | <b>15.0772(7)</b>                                                                           |
| $c / \text{\AA}$                               | <b>17.4768(8)</b>                                                                           |
| $\alpha / ^\circ$                              | <b>90</b>                                                                                   |
| $\beta / ^\circ$                               | <b>109.9420(10)</b>                                                                         |
| $\gamma / ^\circ$                              | <b>90</b>                                                                                   |
| Volume / $\text{\AA}^3$                        | <b>3352.9(3)</b>                                                                            |
| Z                                              | <b>4</b>                                                                                    |
| $\rho_{\text{calc}} / \text{g cm}^{-3}$        | <b>2.206</b>                                                                                |
| $\mu / \text{mm}^{-1}$                         | <b>2.179</b>                                                                                |
| F(000)                                         | <b>2160.0</b>                                                                               |
| Crystal size / $\text{mm}^3$                   | <b><math>0.235 \times 0.163 \times 0.135</math></b>                                         |
| Radiation                                      | <b>Mo <math>K\alpha</math> (<math>\lambda = 0.71073</math>)</b>                             |
| $2\theta$ range for data collection / $^\circ$ | <b>3.2 to 56.728</b>                                                                        |
| Index ranges                                   | <b><math>-18 \leq h \leq 17, -20 \leq k \leq 20, -22 \leq l \leq 23</math></b>              |
| Reflections collected                          | <b>52179</b>                                                                                |
| Independent reflections                        | <b>8306 [<math>R_{\text{int}} = 0.0547</math>]</b>                                          |
| Data/restraints/parameters                     | <b>8306/192/540</b>                                                                         |
| Goodness-of-fit on $F^2$                       | <b>1.055</b>                                                                                |
| Final R indexes [ $I \geq 2\sigma(I)$ ]        | <b><math>R_1 = 0.0380, wR_2 = 0.0885</math></b>                                             |
| Final R indexes [all data]                     | <b><math>R_1 = 0.0515, wR_2 = 0.0942</math></b>                                             |
| Largest diff. peak/hole / $e \text{\AA}^{-3}$  | <b>0.88/-0.42</b>                                                                           |

**Table S4.** Bond lengths for  $[\text{Fe}_3(\mu_3\text{-O})(\mu\text{-CF}_3\text{COO})_6(\text{H}_2\text{O})_3][\text{FeCl}_4]$ .

| Atom | Atom | Length/Å   | Atom | Atom | Length/Å  |
|------|------|------------|------|------|-----------|
| Fe01 | O1   | 1.9103(18) | O5   | C1   | 1.251(3)  |
| Fe01 | O2   | 2.0365(18) | O6   | C1   | 1.239(3)  |
| Fe01 | O5   | 2.0102(18) | O7   | C3   | 1.242(3)  |
| Fe01 | O7   | 2.0093(18) | O8   | C3   | 1.244(3)  |
| Fe01 | O9   | 2.0051(18) | O9   | C5   | 1.249(3)  |
| Fe01 | O11  | 2.0358(18) | O10  | C5   | 1.243(3)  |
| Fe02 | O1   | 1.9096(17) | O11  | C7   | 1.256(3)  |
| Fe02 | O3   | 2.0493(18) | O12  | C7   | 1.239(3)  |
| Fe02 | O10  | 2.0267(18) | O13  | C9   | 1.246(3)  |
| Fe02 | O12  | 2.0134(18) | O14  | C9   | 1.248(3)  |
| Fe02 | O14  | 2.0070(18) | O15  | C11  | 1.239(3)  |
| Fe02 | O16  | 2.0101(18) | O16  | C11  | 1.246(3)  |
| Fe03 | O1   | 1.9155(17) | C1   | C2   | 1.542(4)  |
| Fe03 | O4   | 2.0712(19) | C3   | C4AA | 1.542(4)  |
| Fe03 | O6   | 1.9935(18) | C3   | C4   | 1.542(4)  |
| Fe03 | O8   | 2.0173(19) | C3   | C4A  | 1.542(4)  |
| Fe03 | O13  | 1.9970(19) | C5   | C6   | 1.538(4)  |
| Fe03 | O15  | 2.0135(18) | C7   | C8   | 1.547(4)  |
| F1   | C2   | 1.299(3)   | C9   | C10  | 1.545(4)  |
| F2   | C2   | 1.314(3)   | C11  | C12  | 1.546(4)  |
| F3   | C2   | 1.299(3)   | F4AA | C4AA | 1.322(2)  |
| F7   | C6   | 1.313(4)   | F5AA | C4AA | 1.322(3)  |
| F8   | C6   | 1.319(4)   | F6AA | C4AA | 1.322(3)  |
| F9   | C6   | 1.302(3)   | Fe04 | Cl1  | 2.1852(9) |
| F10  | C8   | 1.325(3)   | Fe04 | Cl2  | 2.2069(9) |
| F11  | C8   | 1.298(3)   | Fe04 | Cl3  | 2.1907(8) |
| F12  | C8   | 1.304(4)   | Fe04 | Cl4  | 2.1827(8) |
| F13  | C10  | 1.316(3)   | F6   | C4   | 1.322(3)  |
| F14  | C10  | 1.321(3)   | F6A  | C4A  | 1.322(2)  |
| F15  | C10  | 1.317(3)   | F4   | C4   | 1.322(3)  |
| F16  | C12  | 1.336(3)   | F4A  | C4A  | 1.322(2)  |
| F17  | C12  | 1.310(3)   | F5   | C4   | 1.322(12) |
| F18  | C12  | 1.327(3)   | F5A  | C4A  | 1.322(3)  |

## Crystallographic information for $[\text{Fe}_4(\mu_3\text{-O})_2(\text{CF}_3\text{COO})_4(\mu\text{-CF}_3\text{COO})_4(\text{H}_2\text{O})_6]\cdot 2\text{H}_2\text{O}$

Single crystals of two different compounds were grown by treating “ $\text{Fe}_3\text{OTFA}$ ” differently after the synthesis. One was determined as  $[\text{Fe}_4(\mu_3\text{-O})_2(\text{CF}_3\text{COO})_4(\mu\text{-CF}_3\text{COO})_4(\text{H}_2\text{O})_6]\cdot 2\text{H}_2\text{O}$  (Figure S3, Table S5-6). It crystallizes in the space group  $P21/n$  after dissolving “ $\text{Fe}_3\text{OTFA}$ ” in toluene at 60 °C, followed by slowly cooling this solution to RT and keeping it in air for one week. The structure can be described as two oxygen-centered triangles sharing one side forming an Fe(III) rhombus, and has been published before by Ponomarev et al.<sup>1</sup>

One  $\text{CF}_3$ -group was strongly disordered and had to be described by 4 partially occupied sites with isotropic displacement parameters, the C-F and C-C-distances were restrained to be equal. All hydrogen atom positions were found in the difference Fourier map and refined independently with exception of two water molecules, where the O-H-distances were restrained to be equal (O10 and O13).

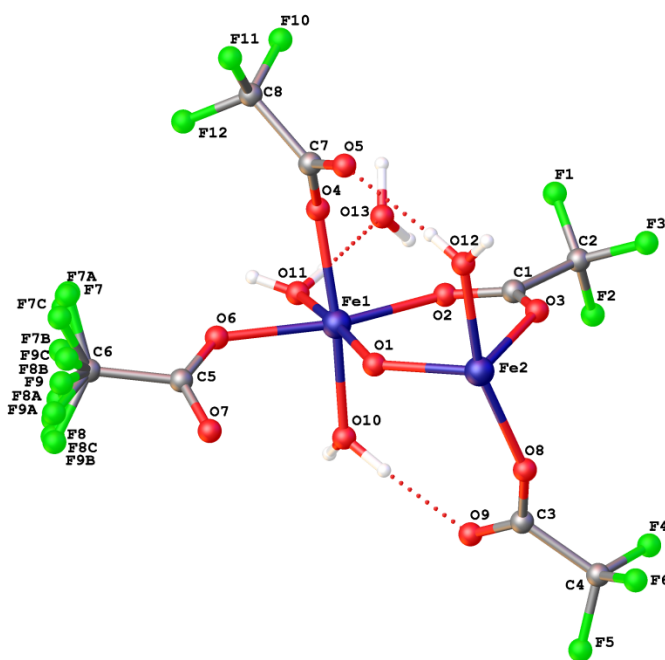

**Figure S3.** Asymmetric unit of  $[\text{Fe}_4(\mu_3\text{-O})_2(\text{CF}_3\text{COO})_4(\mu\text{-CF}_3\text{COO})_4(\text{H}_2\text{O})_6]\cdot 2\text{H}_2\text{O}$ . Because of large displacement parameters of fluorine, the structure is drawn with isotropic displacement parameters for clarity.



**Table S5.** Crystal data and structure refinement for  $[\text{Fe}_4(\mu_3\text{-O})_2(\text{CF}_3\text{COO})_4(\mu\text{-CF}_3\text{COO})_4(\text{H}_2\text{O})_6]\cdot 2\text{H}_2\text{O}$ .

|                                                |                                                                                     |
|------------------------------------------------|-------------------------------------------------------------------------------------|
| CCDC number                                    | <b>1559927</b>                                                                      |
| Empirical formula                              | <b><math>\text{C}_{16}\text{H}_{16}\text{F}_{24}\text{Fe}_4\text{O}_{26}</math></b> |
| Formula weight / $\text{g mol}^{-1}$           | <b>1303.78</b>                                                                      |
| Temperature / K                                | <b>102</b>                                                                          |
| Crystal system                                 | <b>monoclinic</b>                                                                   |
| Space group                                    | <b><math>P2_1/n</math></b>                                                          |
| a / Å                                          | <b>12.9152(9)</b>                                                                   |
| b / Å                                          | <b>8.3225(5)</b>                                                                    |
| c / Å                                          | <b>19.2599(13)</b>                                                                  |
| $\alpha / ^\circ$                              | <b>90</b>                                                                           |
| $\beta / ^\circ$                               | <b>103.8230(10)</b>                                                                 |
| $\gamma / ^\circ$                              | <b>90</b>                                                                           |
| Volume / Å <sup>3</sup>                        | <b>2010.2(2)</b>                                                                    |
| Z                                              | <b>2</b>                                                                            |
| $\rho_{\text{calc}} / \text{g cm}^{-3}$        | <b>2.154</b>                                                                        |
| $\mu / \text{mm}^{-1}$                         | <b>1.615</b>                                                                        |
| F(000)                                         | <b>1280.0</b>                                                                       |
| Crystal size / mm <sup>3</sup>                 | <b>0.4 × 0.21 × 0.12</b>                                                            |
| Radiation                                      | <b>Mo K<math>\alpha</math> (<math>\lambda = 0.71073</math>)</b>                     |
| 2 $\Theta$ range for data collection / °       | <b>3.452 to 53.096</b>                                                              |
| Index ranges                                   | <b><math>-16 \leq h \leq 16, -10 \leq k \leq 10, -24 \leq l \leq 24</math></b>      |
| Reflections collected                          | <b>26832</b>                                                                        |
| Independent reflections                        | <b>4183 [<math>R_{\text{int}} = 0.0494</math>]</b>                                  |
| Data/restraints/parameters                     | <b>4183/32/360</b>                                                                  |
| Goodness-of-fit on $F^2$                       | <b>1.064</b>                                                                        |
| Final R indexes [ $I \geq 2\sigma(I)$ ]        | <b><math>R_1 = 0.0359, wR_2 = 0.0863</math></b>                                     |
| Final R indexes [all data]                     | <b><math>R_1 = 0.0447, wR_2 = 0.0904</math></b>                                     |
| Largest diff. peak/hole / $e \text{ \AA}^{-3}$ | <b>0.77/-0.46</b>                                                                   |

**Table S6.** Bond lengths for  $[\text{Fe}_4(\mu_3\text{-O})_2(\text{CF}_3\text{COO})_4(\mu\text{-CF}_3\text{COO})_4(\text{H}_2\text{O})_6]\cdot 2\text{H}_2\text{O}$ . <sup>1</sup>1-X,1-Y,1-Z

| Atom | Atom            | Length/Å   | Atom | Atom | Length/Å |
|------|-----------------|------------|------|------|----------|
| Fe1  | O1              | 1.8477(18) | O4   | C7   | 1.249(3) |
| Fe1  | O2              | 2.0205(19) | O5   | C7   | 1.234(3) |
| Fe1  | O4              | 2.0044(19) | O6   | C5   | 1.246(3) |
| Fe1  | O6              | 2.0338(18) | O7   | C5   | 1.247(3) |
| Fe1  | O10             | 2.0376(19) | O8   | C3   | 1.252(3) |
| Fe1  | O11             | 2.062(2)   | O9   | C3   | 1.224(3) |
| Fe2  | O1              | 1.9232(18) | C1   | C2   | 1.542(4) |
| Fe2  | O1 <sup>1</sup> | 1.9502(17) | C3   | C4   | 1.542(4) |
| Fe2  | O3              | 2.0690(18) | C5   | C6   | 1.541(4) |
| Fe2  | O7 <sup>1</sup> | 2.0472(19) | C6   | F7A  | 1.299(9) |
| Fe2  | O8              | 1.9936(18) | C6   | F8A  | 1.387(9) |
| Fe2  | O12             | 2.008(2)   | C6   | F9A  | 1.324(8) |
| F1   | C2              | 1.324(4)   | C6   | F7   | 1.368(6) |
| F2   | C2              | 1.317(3)   | C6   | F8   | 1.306(5) |
| F3   | C2              | 1.316(3)   | C6   | F9   | 1.349(5) |
| F4   | C4              | 1.323(4)   | C6   | F7C  | 1.313(7) |
| F5   | C4              | 1.336(3)   | C6   | F8C  | 1.325(7) |
| F6   | C4              | 1.318(3)   | C6   | F9C  | 1.348(7) |
| F10  | C8              | 1.316(4)   | C6   | F7B  | 1.33(2)  |
| F11  | C8              | 1.326(3)   | C6   | F8B  | 1.33(2)  |
| F12  | C8              | 1.327(4)   | C6   | F9B  | 1.36(2)  |
| O2   | C1              | 1.244(3)   | C7   | C8   | 1.534(4) |
| O3   | C1              | 1.238(3)   |      |      |          |

### Crystallographic information for $[\text{Fe}_3(\text{CF}_3\text{COO})_2(\mu\text{-CF}_3\text{COO})_4(\text{CF}_3\text{COOH})_2(\text{H}_2\text{O})_2(\mu\text{-H}_2\text{O})_2]\cdot 2\text{CF}_3\text{COOH}$

The second structure grown post-synthetically,  $[\text{Fe}_3(\text{CF}_3\text{COO})_2(\mu\text{-CF}_3\text{COO})_4(\text{CF}_3\text{COOH})_2(\text{H}_2\text{O})_2(\mu\text{-H}_2\text{O})_2]\cdot 2\text{CF}_3\text{COOH}$  (Figure S4, Table S7-8), was determined from a single crystal grown out of a TFA/toluene solution of “Fe<sub>3</sub>OTFA”, which was stored for 2 weeks in a closed vial. It contains three Fe(II) ions in a row, neighboring ions being bridged by two trifluoroacetates and one water molecule. The coordination spheres of the two outer Fe(II) ions each are completed by a non-bridging trifluoroacetate, a TFA molecule and a water molecule. Such a core structure was found before in a complex with naphthyridine-functionalized ferrocenes trans to the two water molecules on the outer two Fe(II) ions.<sup>2</sup>

The crystal under investigation was twinned by a rotation of  $-3.64^\circ$  around the [100] direction (real space). The ratio of the twin individuals is 0.286(11):0.714. Four of the nine CF<sub>3</sub>-groups showed strong disorder and were described by three partially occupied sites each. The C-F-distances and for two of them also the C-C-distances were restrained to be equal. The hydrogen atoms at the terminal water molecule as well as at the oxygen atom O11 were found in the difference map and were subsequently placed at calculated positions and refined as a rigid group or using the riding model, respectively. The charge of the iron cations cannot be determined unambiguously, since the hydrogen atoms at O1 and O9 cannot be located in the difference Fourier map. Nevertheless, in order to fulfill the electroneutrality condition (assuming exclusively Fe(II)), they were introduced at calculated positions and refined according to the riding-hydrogen model (O9) or with O-H (donor), O-H (acceptor) and H-H distance restraints for the water molecule.

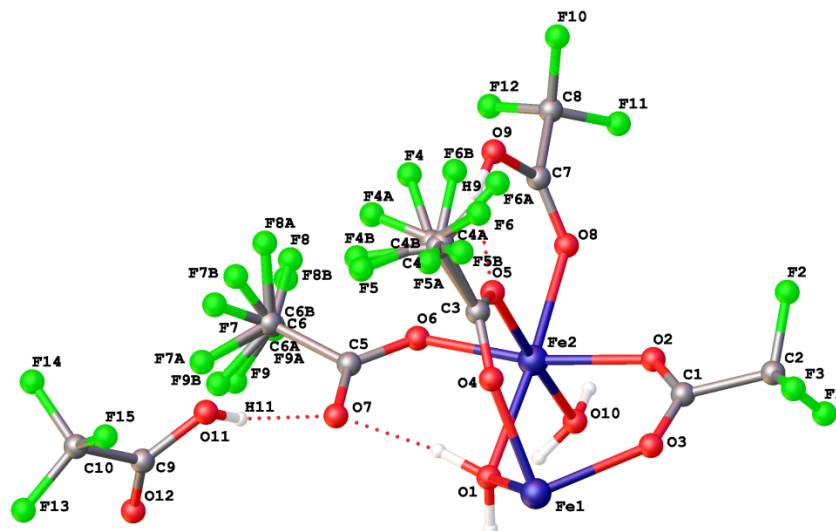

**Figure S4.** Asymmetric unit for  $[\text{Fe}_3(\text{CF}_3\text{COO})_2(\mu\text{-CF}_3\text{COO})_4(\text{CF}_3\text{COOH})_2(\text{H}_2\text{O})_2(\mu\text{-H}_2\text{O})_2] \cdot 2\text{CF}_3\text{COOH}$ . Because of large displacement parameters of fluorine, the structure is drawn with isotropic displacement parameters for clarity.

**Table S7.** Crystal data and structure refinement for  $[\text{Fe}_3(\text{CF}_3\text{COO})_2(\mu\text{-CF}_3\text{COO})_4(\text{CF}_3\text{COOH})_2(\text{H}_2\text{O})_2(\mu\text{-H}_2\text{O})_2] \cdot 2\text{CF}_3\text{COOH}$ .

|                                                              |                                                                                     |
|--------------------------------------------------------------|-------------------------------------------------------------------------------------|
| CCDC number                                                  | <b>1559928</b>                                                                      |
| Empirical formula                                            | <b><math>\text{C}_{20}\text{H}_{12}\text{F}_{30}\text{Fe}_3\text{O}_{24}</math></b> |
| Formula weight / $\text{g mol}^{-1}$                         | <b>1373.85</b>                                                                      |
| Temperature / K                                              | <b>250</b>                                                                          |
| Crystal system                                               | <b>triclinic</b>                                                                    |
| Space group                                                  | <b><i>P</i>-1</b>                                                                   |
| <i>a</i> / Å                                                 | <b>9.201(5)</b>                                                                     |
| <i>b</i> / Å                                                 | <b>10.484(6)</b>                                                                    |
| <i>c</i> / Å                                                 | <b>12.232(6)</b>                                                                    |
| $\alpha$ / °                                                 | <b>84.900(14)</b>                                                                   |
| $\beta$ / °                                                  | <b>71.634(14)</b>                                                                   |
| $\gamma$ / °                                                 | <b>81.897(14)</b>                                                                   |
| Volume / Å <sup>3</sup>                                      | <b>1107.5(10)</b>                                                                   |
| <i>Z</i>                                                     | <b>1</b>                                                                            |
| $\rho_{\text{calc}}$ / $\text{g cm}^{-3}$                    | <b>2.060</b>                                                                        |
| $\mu$ / $\text{mm}^{-1}$                                     | <b>1.177</b>                                                                        |
| F(000)                                                       | <b>672.0</b>                                                                        |
| Crystal size / $\text{mm}^3$                                 | <b>0.376 × 0.172 × 0.128</b>                                                        |
| Radiation                                                    | <b>Mo K<math>\alpha</math> (<math>\lambda = 0.71073</math>)</b>                     |
| 2 $\Theta$ range for data collection / °                     | <b>3.512 to 53.076</b>                                                              |
| Index ranges                                                 | <b>-10 ≤ <i>h</i> ≤ 11, -12 ≤ <i>k</i> ≤ 12, 0 ≤ <i>l</i> ≤ 15</b>                  |
| Reflections collected                                        | <b>4731</b>                                                                         |
| Independent reflections                                      | <b>4731 [<i>R</i><sub>int</sub> = merged]</b>                                       |
| Data/restraints/parameters                                   | <b>4731/564/476</b>                                                                 |
| Goodness-of-fit on <i>F</i> <sup>2</sup>                     | <b>0.924</b>                                                                        |
| Final <i>R</i> indexes [ <i>I</i> ≥ 2 $\sigma$ ( <i>I</i> )] | <b><i>R</i><sub>1</sub> = 0.0653, <i>wR</i><sub>2</sub> = 0.1362</b>                |
| Final <i>R</i> indexes [all data]                            | <b><i>R</i><sub>1</sub> = 0.1413, <i>wR</i><sub>2</sub> = 0.1619</b>                |
| Largest diff. peak/hole / $\text{e Å}^{-3}$                  | <b>0.88/-0.53</b>                                                                   |

**Table S8.** Bond lengths for [Fe<sub>3</sub>(CF<sub>3</sub>COO)<sub>2</sub>(μ-CF<sub>3</sub>COO)<sub>4</sub>(CF<sub>3</sub>COOH)<sub>2</sub>(H<sub>2</sub>O)<sub>2</sub>(μ-H<sub>2</sub>O)<sub>2</sub>].2CF<sub>3</sub>COOH. <sup>1</sup>1-X,1-Y,1-Z

| Atom | Atom            | Length/Å  | Atom | Atom | Length/Å  |
|------|-----------------|-----------|------|------|-----------|
| Fe1  | O1 <sup>1</sup> | 2.153(3)  | F8A  | C6A  | 1.328(15) |
| Fe1  | O1              | 2.153(3)  | F9B  | C6B  | 1.327(13) |
| Fe1  | O3              | 2.037(4)  | F9A  | C6A  | 1.328(15) |
| Fe1  | O3 <sup>1</sup> | 2.037(4)  | F10  | C8   | 1.293(9)  |
| Fe1  | O4              | 2.047(4)  | F11  | C8   | 1.295(9)  |
| Fe1  | O4 <sup>1</sup> | 2.047(4)  | F12  | C8   | 1.278(8)  |
| Fe2  | O1              | 2.180(4)  | O2   | C1   | 1.235(7)  |
| Fe2  | O2              | 2.066(4)  | O3   | C1   | 1.225(6)  |
| Fe2  | O5              | 2.084(4)  | O4   | C3   | 1.230(7)  |
| Fe2  | O6              | 2.041(4)  | O5   | C3   | 1.253(7)  |
| Fe2  | O8              | 2.141(4)  | O6   | C5   | 1.248(7)  |
| Fe2  | O10             | 2.012(4)  | O7   | C5   | 1.227(7)  |
| F1   | C2              | 1.310(8)  | O8   | C7   | 1.182(8)  |
| F2   | C2              | 1.328(8)  | O9   | C7   | 1.320(8)  |
| F3   | C2              | 1.308(7)  | C1   | C2   | 1.520(8)  |
| F4B  | C4B             | 1.314(5)  | C3   | C4A  | 1.510(9)  |
| F4   | C4              | 1.336(8)  | C3   | C4B  | 1.510(9)  |
| F4A  | C4A             | 1.313(7)  | C3   | C4   | 1.510(9)  |
| F5A  | C4A             | 1.313(7)  | C5   | C6B  | 1.542(9)  |
| F5B  | C4B             | 1.314(5)  | C5   | C6A  | 1.542(9)  |
| F5   | C4              | 1.336(8)  | C7   | C8   | 1.505(10) |
| F6A  | C4A             | 1.313(7)  | F13  | C10  | 1.325(8)  |
| F6B  | C4B             | 1.314(5)  | F14  | C10  | 1.284(9)  |
| F6   | C4              | 1.336(8)  | F15  | C10  | 1.275(8)  |
| F7A  | C6A             | 1.328(15) | O11  | C9   | 1.297(7)  |
| F7B  | C6B             | 1.327(13) | O12  | C9   | 1.193(7)  |
| F8B  | C6B             | 1.327(13) | C9   | C10  | 1.512(10) |

## Materials Characterization

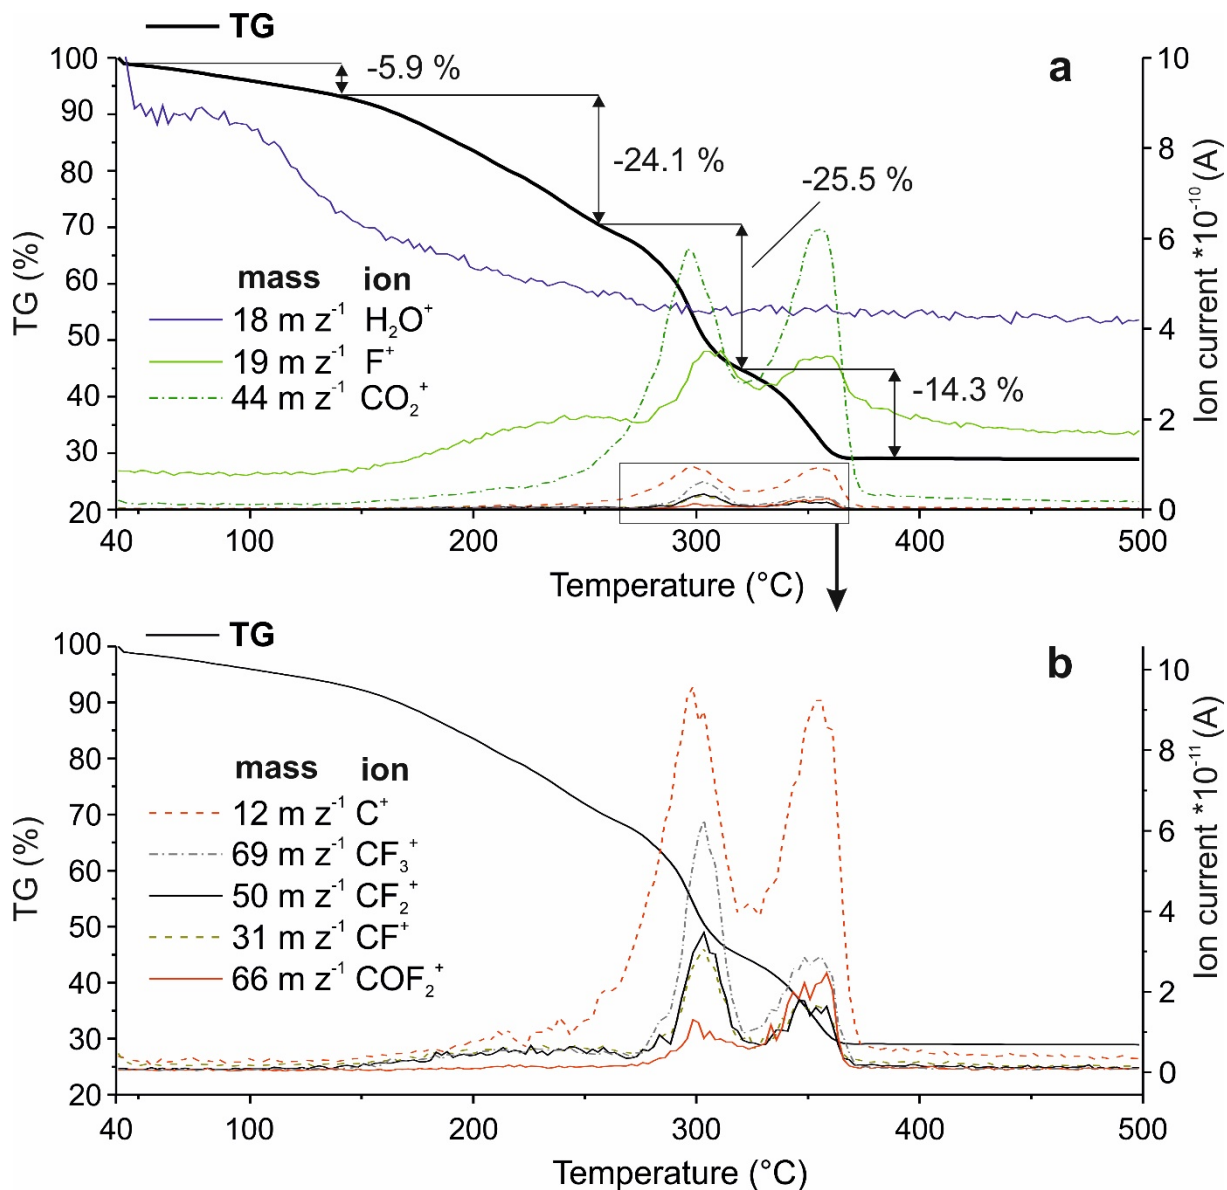

**Figure S5.** TGA-MS measurement of “Fe<sub>3</sub>OTFA” between 40 and 500 °C with a heating rate of 5 °C min<sup>-1</sup> under Ar flow (40 ml min<sup>-1</sup>). a) “Fe<sub>3</sub>OTFA” decomposes in four steps. First, water is released (-5.9%, calculated -3.2%) followed by the decomposition of 3 TFA ligands (-24.1%, calculated -25.1%). The remaining 5 TFA ligands are decomposed in 2 pronounced steps at 297 °C (-25.5%, calc. -25.1%) and 355 °C (-14.3%, calc. -16.7%). The remaining mass of 28.9% corresponds to 3Fe 1O 6F (calc. 26.5%). The main decomposition gases are H<sub>2</sub>O, fluorine and CO<sub>2</sub> as analyzed by MS. b) By zooming to lower ion current, the spectra of the minor decomposition gases become visible. Those are CF<sub>x</sub> (x = 1 – 3) and COF<sub>2</sub>. Interestingly, the CF<sub>x</sub> decomposition products appear mostly at 297 °C, whereas COF<sub>2</sub> appears more intensely at 355 °C.

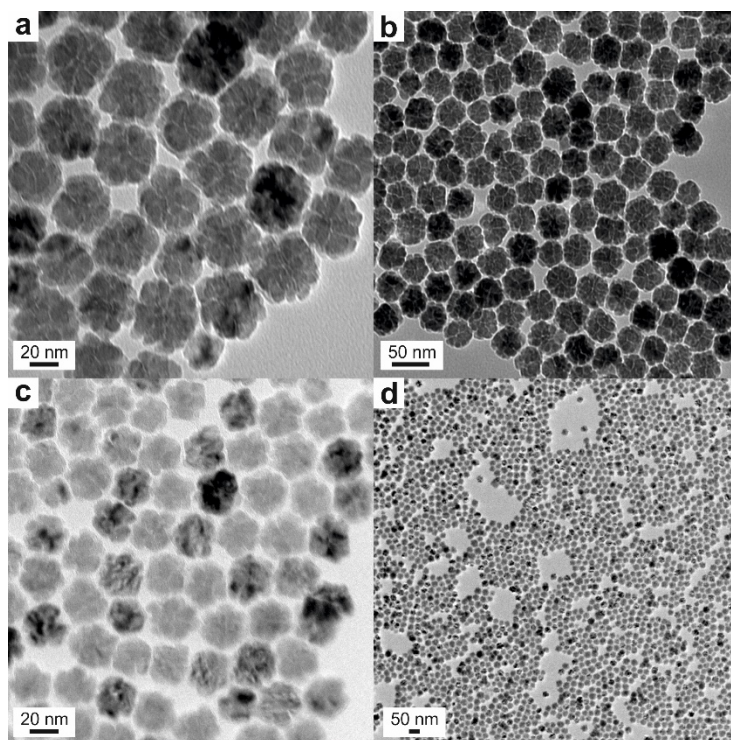

**Figure S6.** Size-variation of popcorn-shaped  $\text{Fe}_x\text{O}$  NPs based on different “ $\text{Fe}_3\text{OTFA}$ ” concentrations synthesized at  $260^\circ\text{C}$  for 20 min. TEM images of a), b) NPs synthesized with 0.3 mmol “ $\text{Fe}_3\text{OTFA}$ ”, 3.6 mmol OA, 5.4 mmol HDA in 10 mL TOP/squalane (1:1), and of c), d) NPs synthesized with 0.4 mmol “ $\text{Fe}_3\text{OTFA}$ ”, 3.6 mmol OA, 5.4 mmol HDA in 10 mL TOP/squalane (1:1).

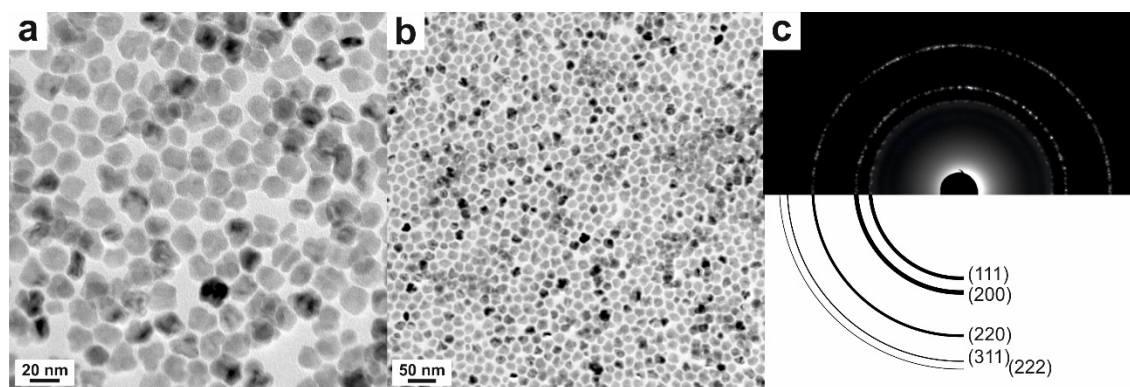

**Figure S7.** a), b) TEM images of fragmented  $\text{Fe}_x\text{O}$  popcorn-shaped particles obtained in a synthesis with increased HDA/OA ratio. c) SAED pattern of such  $\text{Fe}_x\text{O}$  NPs.



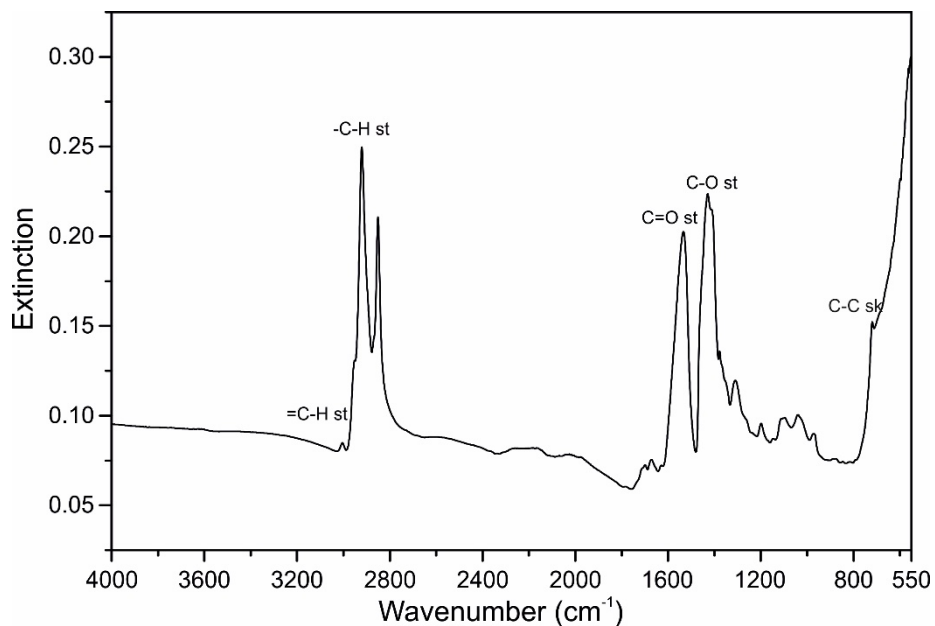

**Figure S8.** FTIR spectrum of popcorn-shaped wüstite NPs. The predominant surface ligand is oleate.

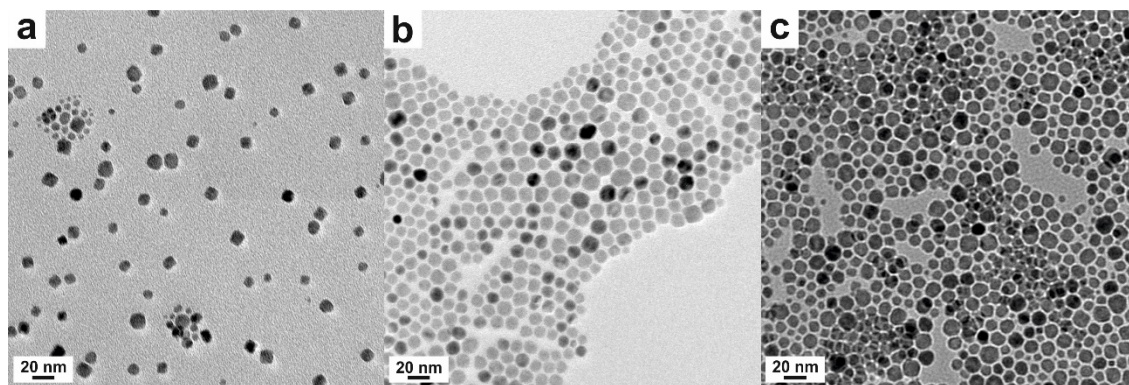

**Figure S9.** TEM images of particles synthesized by adding the precursor after the drying period of 1.5 h at 110 °C. The synthesis was performed at 260 °C for a) 20 min, b) 40 min, and c) 60 min. No popcorn-shaped particles are observed, if the precursor is added after the drying period, thus not catalyzing amide-formation or undergoing a structural change.

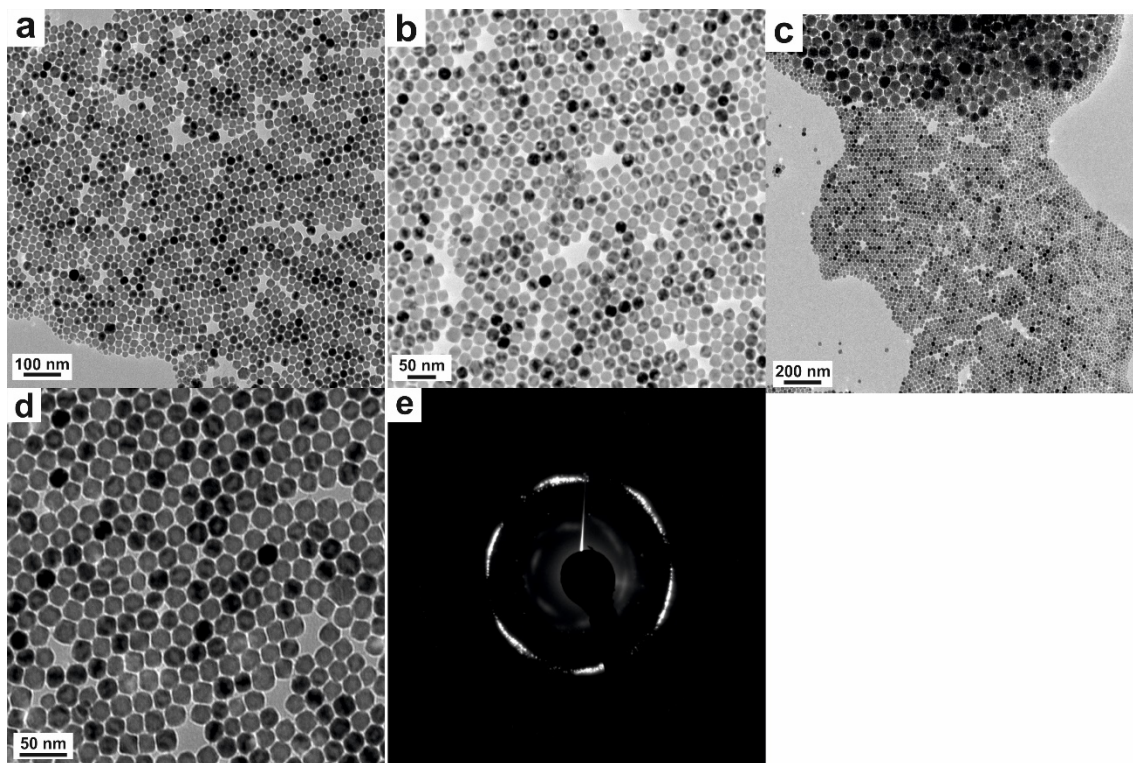

**Figure S10.** Monodisperse wüstite NPs (probably deltoidal icositetrahedron shaped) synthesized with increased amount of OA/HDA (13x/19x) and reaction time at 260 °C to 1 h. Calculated to 0.3 mmol “Fe<sub>3</sub>OTFA” in the same TOP/squalene 1:1 solvent. a) – d) LRTEM images and e) SAED spectra of the monodisperse deltoidal icositetrahedron shaped wüstite NPs.

**Rietveld refinement.** The composition of the Fe<sub>x</sub>O (x~0.94) NPs was analyzed based on the powder XRD pattern (Cu Kα<sub>1</sub> radiation, λ= 1.540598 Å) by a Rietveld refinement with the GSAS program<sup>3-5</sup> (Figure S11). For the refinement a reference Fe<sub>x</sub>O structure<sup>6</sup> was used with the following parameters: space group *Fm-3m*, Z = 4, Fe: (x, y, z) = (0,0,0), occupancy = 0.944, U<sub>iso</sub> = 0.00032 Å<sup>2</sup>; O: (x, y, z) = (0.5,0.5,0.5), occupancy = 1, U<sub>iso</sub> = 0.00032 Å<sup>2</sup>. The stoichiometry of Fe<sub>x</sub>O revealing x~0.94 was calculated<sup>7</sup> based on the unit cell parameter obtained by the refinement, a = 4.3095(1) Å. The figures of merit of the fit were χ<sup>2</sup> = 0.3184, wR<sub>p</sub> = 0.0091 R<sub>p</sub> = 0.0066, RF<sup>2</sup> = 0.1053. The peak asymmetry and the broadening of the (222)-reflection (60°) can be attributed to the non-homogeneous strain field caused by the Fe(III)-distribution vacancies.<sup>8</sup> The large background is largely related to the polymer film used for sample preparation.

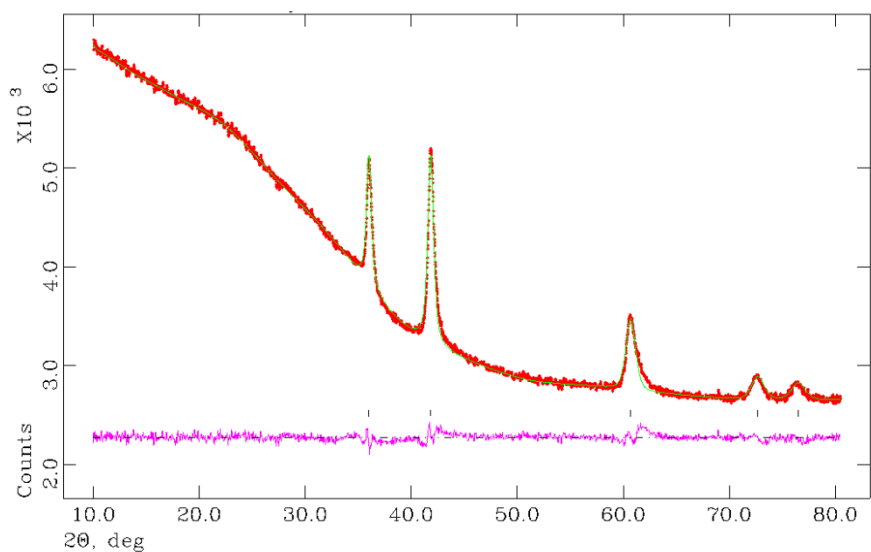

**Figure S11.** Rietveld refinement of popcorn-shaped  $\text{Fe}_x\text{O}$  ( $x \sim 0.94$ ) NPs with space group  $Fm\text{-}3m$ . Experimental powder XRD (red), refinement (green) using a starting reference<sup>6</sup> and the residuals (purple).

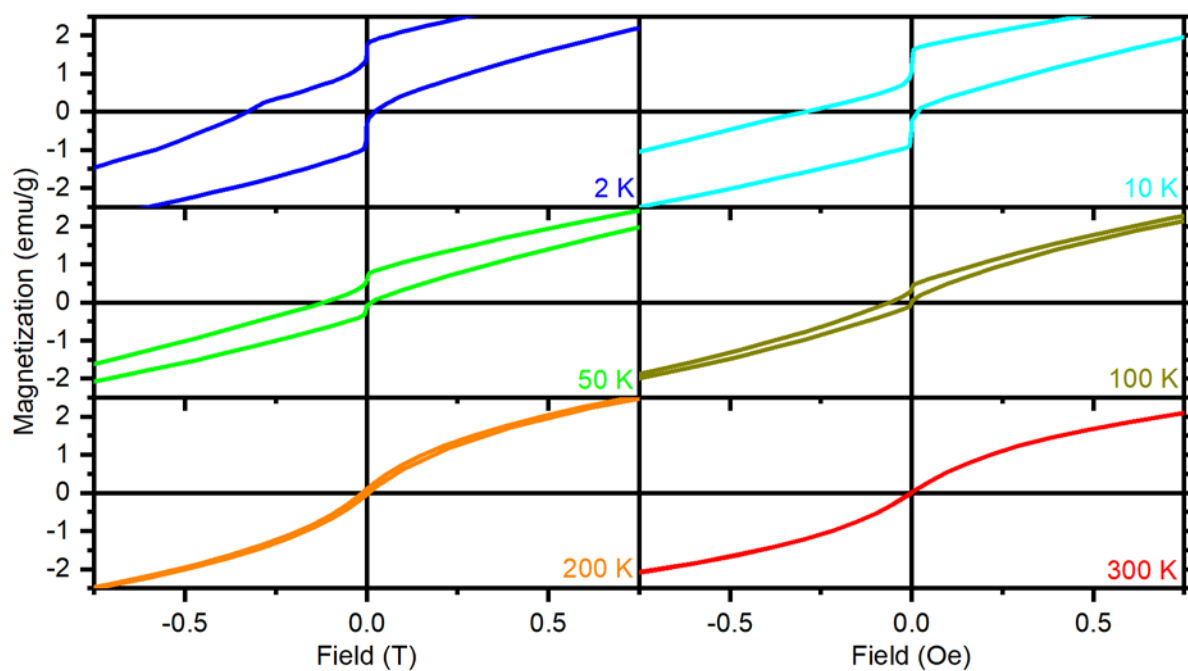

**Figure S12.** The low-field region of the magnetic hysteresis curves of  $\text{Fe}_x\text{O}$  NPs after cooling in a magnetic field of 1 T, clearly showing exchange bias.

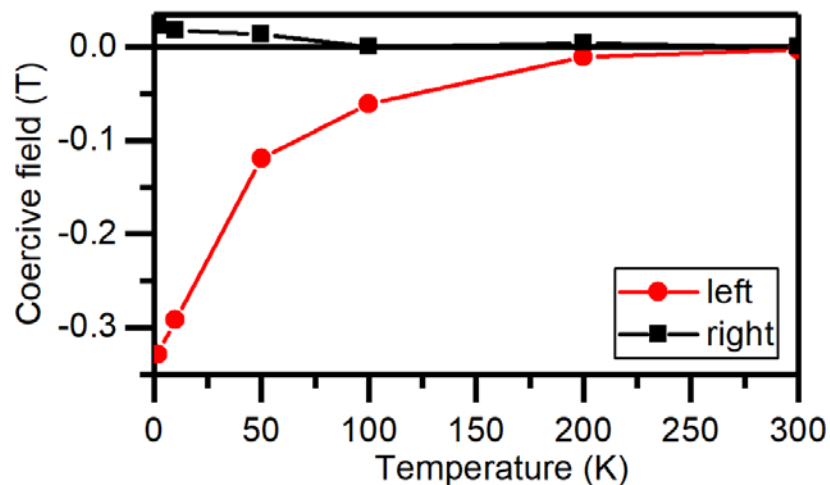

**Figure S13.** The coercive field of the  $\text{Fe}_x\text{O}$  NPs after cooling in a magnetic field of 1 T determined from the data in Figure S13. Left and right indicate the coercive field after decreasing the field from 9 T and increasing the field from -9 T, respectively.

## References

1. Ponomarev, V. I.; Atovmyan, L. O.; Bobkova, S. A.; Turte, K. I., A New Tetranuclear Complex of Fe(III)-Crystal- and Molecularstructure of  $[\text{Fe}_4\text{O}_2(\text{CF}_3\text{COO})_8(\text{H}_2\text{O})_6] \cdot 2\text{H}_2\text{O}$  at 300 K. *Dokl. Akad. Nauk SSSR* **1984**, 274, 368.
2. Sadhukhan, N.; Sarkar, M.; Ghatak, T.; Rahaman, S. M.; Barbour, L. J.; Bera, J. K., Reactions of Acids with Naphthyridine-Functionalized Ferrocenes: Protonation and Metal Extrusion. *Inorg. Chem.* **2013**, 52, 1432-1442.
3. Rietveld, H. M., The Rietveld Method: a Retrospection. *Z. Kristallogr.* **2010**, 225, 545-547.
4. Larson, A. C.; Von Dreele, R. B., General Structure Analysis System (GSAS). *LAUR* **1994**, 86-748.
5. Brian, T., EXPGUI, a Graphical User Interface for GSAS. *J. Appl. Crystallogr.* **2001**, 34, 210-213.
6. Jette, E. R.; Foote, F., An X-Ray Study of the Wüstite ( $\text{FeO}$ ) Solid Solutions. *J. Chem. Phys* **1933**, 1, 29-36.
7. McCammon, C. A.; Liu, L. G., The Effects of Pressure and Temperature on Nonstoichiometric Wüstite,  $\text{Fe}_x\text{O}$ : The Iron-rich Phase Boundary. *Phys. Chem. Minerals* **1984**, 10, 106-113.
8. Balzar, D., X-Ray Diffraction Line Broadening: Modeling and Applications to High-Tc Superconductors. *J. Res. Natl. Inst. Stand. Technol.* **1993**, 98.
